# Supplementary material for: Bioinformatic analysis and in vitro validation of a five-microRNA signature as a prognostic biomarker of hepatocellular carcinoma
Source: PubMed Central journal article supplement — Ann Transl Med. 2020 Nov;8(21):1422. doi: 10.21037/atm-20-2509 (PMC7723630; doi:10.21037/atm-20-2509), 2020-11
Supplement: atm-08-21-1422-supplementary.pdf [file atm-08-21-1422-supplementary.pdf]

Training  
group

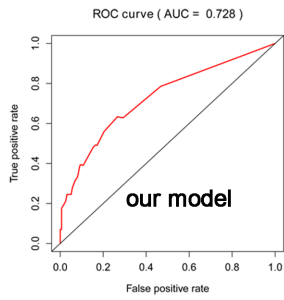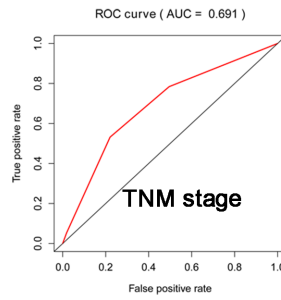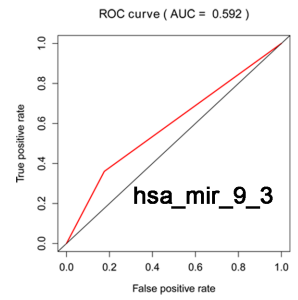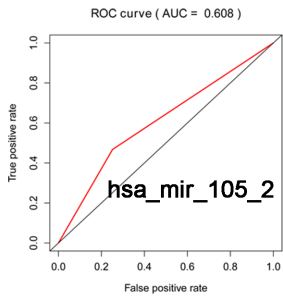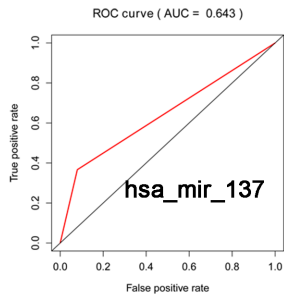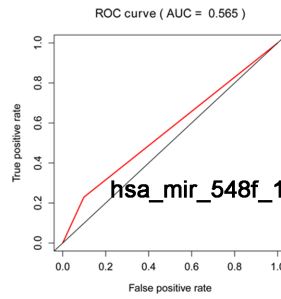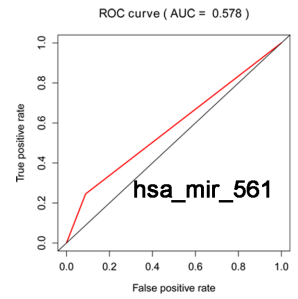

Test  
group

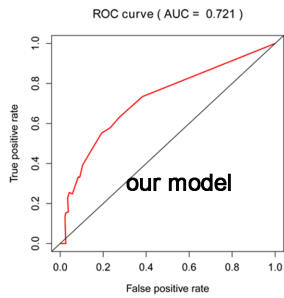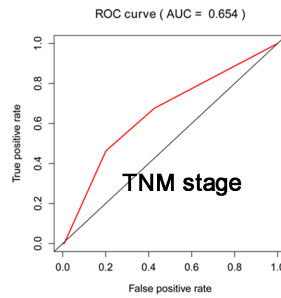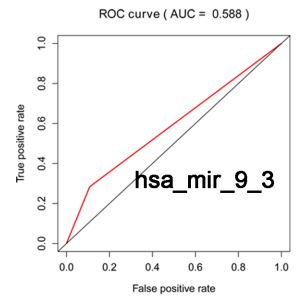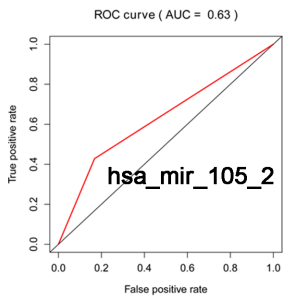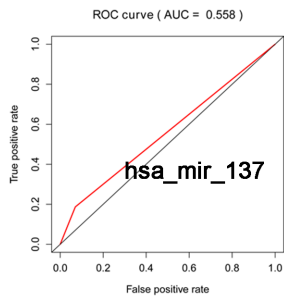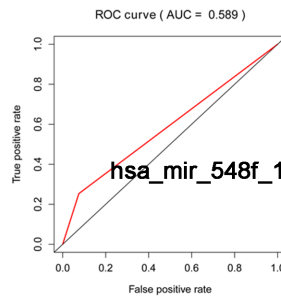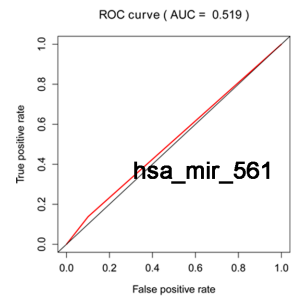

Figure S1 The AUC of miRNA model was higher than that of every single miRNA or TNM stage. AUC, area under curve.
